# Supplementary material for: Procalcitonin Is Not a Reliable Biomarker of Bacterial Coinfection in People With Coronavirus Disease 2019 Undergoing Microbiological Investigation at the Time of Hospital Admission
Source: PubMed Central journal article supplement (PMC9070482; doi:10.1093/ofid/ofac179), 2022-05-01
Supplement: ofac179_suppl_supplementary_material.pdf [file ofac179_suppl_supplementary_material.pdf]

Procalcitonin is not a reliable biomarker of bacterial co-infection in COVID-19 at the time of hospital admission

Supplementary Material

**Contents:**

|                                                                                                     |   |
|-----------------------------------------------------------------------------------------------------|---|
| Supplementary Table 1: Characteristics of 1040 included patients.....                               | 2 |
| Supplementary Figure 1: Microbiological findings .....                                              | 3 |
| Supplementary Figure 2: Relationship of plasma procalcitonin with CRP, IL-6 and TNF- $\alpha$ ..... | 4 |

Supplementary Table 1: Characteristics of 1040 included patients

| Variable                                    | Included patients |          |             | Entire cohort    |
|---------------------------------------------|-------------------|----------|-------------|------------------|
|                                             | n <sup>a</sup>    | (n=1040) |             | (n=48,902)       |
| <b>Patient characteristics</b>              |                   |          |             |                  |
| Male sex, n (%)                             | 1039              | 635      | (61.1%)     | 57.4%            |
| Age, years                                  | 1037              | 65       | (53-77)     | 74 (59-84)       |
| Co-morbidities, n (%)                       |                   |          |             |                  |
| Hypertension                                | 652               | 326      | (50.0%)     | 48.4%            |
| Chronic lung disease                        | 1014              | 301      | (29.7%)     | 28.7%            |
| Diabetes mellitus                           | 1015              | 265      | (26.1%)     | 29.4%            |
| Chronic cardiac disease                     | 1000              | 259      | (25.9%)     | 32.3%            |
| Immunocompromise                            | 713               | 162      | (22.7%)     | 29.3%            |
| Obesity                                     | 889               | 196      | (22.0%)     | 11.9%            |
| Chronic kidney disease                      | 1002              | 150      | (15.0%)     | 17.8%            |
| Liver disease                               | 993               | 21       | (2.1%)      | 1.9%             |
| <b>Physiological parameters<sup>b</sup></b> |                   |          |             |                  |
| Temperature, °C                             | 1029              | 37.6     | (36.8-38.4) | 37.4 (36.3-38.5) |
| Respiratory rate, breaths/min               | 1029              | 24       | (20-30)     | 21 (18-26)       |
| Systolic blood pressure, mmHg               | 1028              | 129      | (114-145)   | 131 (106-156)    |
| Heart rate, beats/min                       | 1033              | 94       | (83-109)    | 92 (71-113)      |
| SpO <sub>2</sub> , %                        | 1026              | 94       | (90-96)     | 95 (92-97)       |
| <b>Investigations<sup>b</sup></b>           |                   |          |             |                  |
| Chest x-ray infiltrates, n (%) <sup>c</sup> | 850               | 650      | (76.5)      | 67.5%            |
| Total white cell count, x10 <sup>9</sup> /L | 1035              | 7.5      | (5.5-10.5)  | 7.3 (5.3-10.3)   |
| C-reactive protein, mg/L                    | 1028              | 116      | (56-196)    | 83 (35-157)      |
| Procalcitonin, ng/mL                        | 1040              | 0.28     | (0.1-1.0)   | 0.3 (0.1-1.1)    |
| <b>Supportive care, n (%)</b>               |                   |          |             |                  |
| Critical care admission                     | 1040              | 409      | (39.3%)     | 14.5%            |
| Invasive mechanical ventilation             | 1019              | 301      | (29.5%)     | 9.3%             |
| <b>Outcomes, n (%)</b>                      |                   |          |             |                  |
| Discharged alive                            | 1040              | 591      | (56.8%)     | 58.9%            |
| In-hospital mortality                       | 1040              | 346      | (33.3%)     | 31.5%            |
| Transfer to another facility                | 1040              | 52       | (5.0%)      | 5.4%             |
| Ongoing hospitalisation                     | 1040              | 43       | (4.1%)      | 2.4%             |
| Palliative discharge                        | 1040              | 8        | (0.8%)      | 1.8%             |

Data are median (IQR) unless otherwise stated.

<sup>a</sup>Number of patients included in procalcitonin analysis with data available

<sup>b</sup>Recorded on admission to hospital

<sup>c</sup>As a proportion of patients who had chest x-ray results recorded

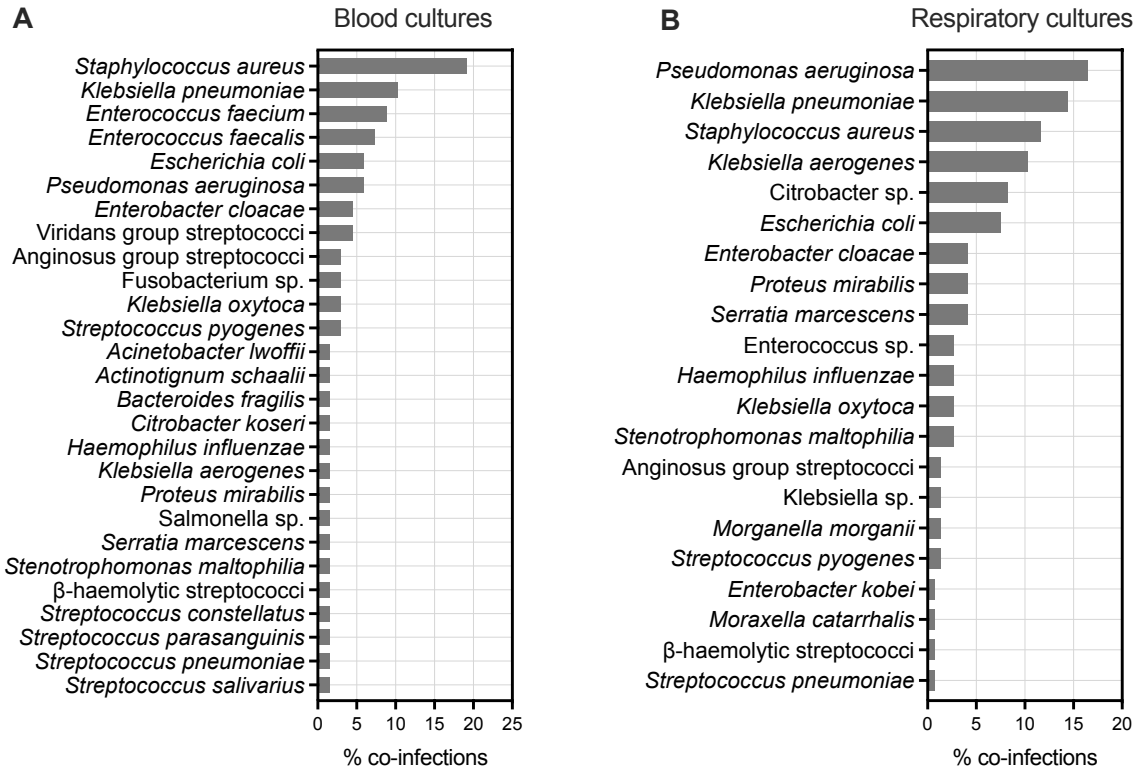

**Supplementary Figure 1: Microbiological findings**

Bacterial pathogens recovered from **(A)** blood and **(B)** respiratory cultures, expressed as the percentage of co-infections from each sample type accounted for by each organism.

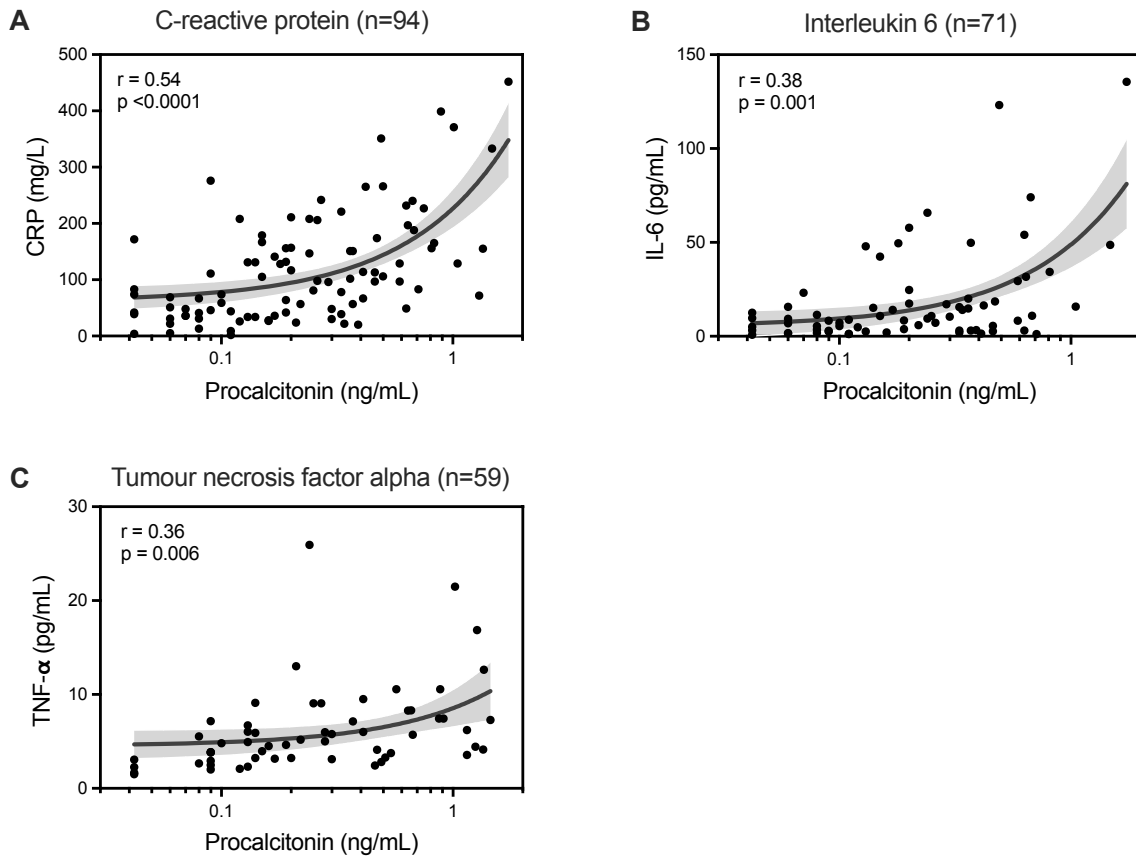

**Supplementary Figure 2: Relationship of plasma procalcitonin with CRP, IL-6 and TNF- $\alpha$**

The plots show linear regressions with 95% confidence intervals for procalcitonin with **(A)** CRP (n=94), **(B)** IL-6 (n=71) and **(C)** TNF- $\alpha$  (n=59). Correlation assessed with Spearman's test. Procalcitonin measurements below the lower limit of detection (LLOD) of the assay (0.06 ng/mL) were imputed with the LLOD divided by the square root of two. The x-axis shows a Log<sub>10</sub> scale.
